# Supplementary material for: Protection against COVID-19 hospitalisation conferred by primary-series vaccination with AZD1222 in non-boosted individuals: first vaccine effectiveness results of the European COVIDRIVE study and meta-regression analysis
Source: PubMed Central journal article supplement (PMC10398604; doi:10.1016/j.lanepe.2023.100675), 2023-07-01
Supplement: mmc1.pdf [file mmc1.pdf]

## Supplementary Appendix

### Table of contents

| Content                                                                                                                                                                             | Page |
|-------------------------------------------------------------------------------------------------------------------------------------------------------------------------------------|------|
| <b>Supplemental Tables</b>                                                                                                                                                          |      |
| Table S1: Recruitment periods for the Study Contributors (databases) from which data for the analysis were received                                                                 | 2    |
| Table S2: Demographic characteristics of the study population, stratified by country                                                                                                | 3    |
| Table S3: Demographic characteristics of the study population, stratified by SARS-CoV-2 variant periods                                                                             | 6    |
| Table S4: Cumulative symptom onset date-adjusted VE estimates by time since last dose and by SARS-CoV-2 genetic variant in SARI patients who had received two doses of AZD1222      | 9    |
| Table S5: Confounder-adjusted VE estimates by calendar time in SARI patients who had received two doses of AZD1222 and were hospitalised between June 1, 2021 and September 5, 2022 | 10   |
| <b>Supplemental Figures</b>                                                                                                                                                         |      |
| Figure S1: Attrition diagram of participants in the COVIDRIVE study and the SARI patients in this study of AZD1222.                                                                 | 11   |

### COVIDRIVE master protocol

The COVIDRIVE master protocol is registered with the European Network of Centres for Pharmacoepidemiology and Pharmacovigilance (ENCePP, EUPAS42328) and is available to download from: <https://www.encepp.eu/encepp/viewResource.htm?id=42329> – the protocol is also available to download from the COVIDRIVE study website at: <https://covidrive.eu/study-documents/>, including current and previous versions.

**Table S1: Recruitment periods for the Study Contributors (databases) from which data for the analysis were received.**

| Country | Study Contributor                                                                                                                 | Number of individual hospitals, n | Start of prospective recruitment <sup>a</sup> | Start of retrospective recruitment <sup>b</sup> |
|---------|-----------------------------------------------------------------------------------------------------------------------------------|-----------------------------------|-----------------------------------------------|-------------------------------------------------|
| Austria | Klinik Favoriten, Vienna                                                                                                          | 1                                 | April 4 <sup>th</sup> , 2022                  | June 1 <sup>st</sup> , 2021 <sup>c</sup>        |
| Belgium | Le Centre Hospitalier Universitaire St Pierre, Brussels                                                                           | 1                                 | February 3 <sup>rd</sup> , 2022               | June 1 <sup>st</sup> , 2021 <sup>c</sup>        |
| Belgium | Universitair Ziekenhuis Antwerpen (UZA), Antwerp                                                                                  | 1                                 | December 28 <sup>th</sup> , 2021              | June 1 <sup>st</sup> , 2021                     |
| Italy   | Inter-university Research Centre on Influenza and Other Transmissible Infections (CIRI-IT), Genoa                                 | 4                                 | November 16 <sup>th</sup> , 2021              | NA <sup>d</sup>                                 |
| Spain   | Fundación para el Fomento de la Investigación Sanitaria y Biomédica (FISABIO) de la Comunitat Valenciana, Salud Pública, Valencia | 4                                 | September 15 <sup>th</sup> , 2021             | NA <sup>d</sup>                                 |
| Spain   | Hospital Germans Trias i Pujol, Badalona, Barcelona                                                                               | 1                                 | October 20 <sup>th</sup> , 2021               | July 1 <sup>st</sup> , 2021 <sup>c</sup>        |
| Spain   | Hospital Universitari Vall d'Hebron, Barcelona                                                                                    | 1 <sup>e</sup>                    | February 14 <sup>th</sup> , 2022              | October 30 <sup>th</sup> , 2021                 |

<sup>a</sup>Start of prospective patient recruitment is the date the site opened for recruitment. <sup>b</sup>Date of hospital admission of the first admitted patient among the retrospective data. <sup>c</sup>Study Contributor yet to provide all retrospective data. <sup>d</sup>Study Contributor is not contracted to collect retrospective data and thus only provided prospective data. <sup>e</sup>Hospital Universitari Vall d'Hebron only provided data from one hospital for this interim analysis but a second hospital is joining COVIDRIVE at this Study Contributor.

NA=not applicable.

**Table S2: Demographic characteristics of the study population, stratified by country**

| Characteristic                                         | Austria<br>(Jun 2021–Sep 2022) |                     |                     | Belgium<br>(Jun 2021–Sep 2022) |                     |                     | Italy<br>(Nov 2021–Sep 2022) |                     |                     | Spain<br>(Jul 2021–Sep 2022) |                     |                     |
|--------------------------------------------------------|--------------------------------|---------------------|---------------------|--------------------------------|---------------------|---------------------|------------------------------|---------------------|---------------------|------------------------------|---------------------|---------------------|
|                                                        | Total<br>(N=79)                | TNC<br>(n=2)        | TPC<br>(n=77)       | Total<br>(N=153)               | TNC<br>(n=24)       | TPC<br>(n=129)      | Total<br>(N=131)             | TNC<br>(n=36)       | TPC<br>(n=95)       | Total<br>(N=398)             | TNC<br>(n=138)      | TPC<br>(n=260)      |
|                                                        |                                |                     |                     |                                |                     |                     |                              |                     |                     |                              |                     |                     |
| <b>Age at hospitalisation, years</b>                   | 57.0<br>(44.0–68.5)            | 79.5<br>(77.8–81.2) | 56.0<br>(44.0–68.0) | 49.0<br>(37.0–63.0)            | 58.5<br>(34.8–73.8) | 49.0<br>(37.0–60.0) | 63.0<br>(51.5–72.5)          | 59.0<br>(45.8–68.5) | 65.0<br>(54.0–74.0) | 62.0<br>(44.2–69.0)          | 64.0<br>(54.0–69.0) | 61.0<br>(43.0–69.0) |
| 18–49                                                  | 29 (36.7)                      | 0                   | 29 (37.7)           | 78 (51.0)                      | 10 (41.7)           | 68 (52.7)           | 26 (19.8)                    | 13 (36.1)           | 13 (13.7)           | 115 (28.9)                   | 30 (21.7)           | 85 (32.7)           |
| 50–64                                                  | 25 (31.6)                      | 0                   | 25 (32.5)           | 38 (24.8)                      | 4 (16.7)            | 34 (26.4)           | 43 (32.8)                    | 10 (27.8)           | 33 (34.7)           | 119 (29.9)                   | 40 (29.0)           | 79 (30.4)           |
| ≥65                                                    | 25 (31.6)                      | 2 (100)             | 23 (29.9)           | 37 (24.2)                      | 10 (41.7)           | 27 (20.9)           | 62 (47.3)                    | 13 (36.1)           | 49 (51.6)           | 164 (41.2)                   | 68 (49.3)           | 96 (36.9)           |
| <b>Sex</b>                                             |                                |                     |                     |                                |                     |                     |                              |                     |                     |                              |                     |                     |
| Female                                                 | 40 (50.6)                      | 1 (50.0)            | 39 (50.6)           | 63 (41.2)                      | 9 (37.5)            | 54 (41.9)           | 55 (42.0)                    | 14 (38.9)           | 41 (43.2)           | 165 (41.5)                   | 54 (39.1)           | 111 (42.7)          |
| Male                                                   | 39 (49.4)                      | 1 (50.0)            | 38 (49.4)           | 90 (58.8)                      | 15 (62.5)           | 75 (58.1)           | 76 (58.0)                    | 22 (61.1)           | 54 (56.8)           | 233 (58.5)                   | 84 (60.9)           | 149 (57.3)          |
| <b>Body mass index (BMI) category</b>                  |                                |                     |                     |                                |                     |                     |                              |                     |                     |                              |                     |                     |
| Underweight (BMI <18.5)                                | 1 (1.3)                        | 0                   | 1 (1.3)             | 2 (1.3)                        | 0                   | 2 (1.6)             | 2 (1.5)                      | 1 (2.8)             | 1 (1.1)             | 1 (0.3)                      | 0                   | 1 (0.4)             |
| Normal/healthy weight (BMI ≥18.5 to <25.0)             | 12 (15.2)                      | 0                   | 12 (15.6)           | 9 (5.9)                        | 3 (12.5)            | 6 (4.7)             | 52 (39.7)                    | 18 (50.0)           | 34 (35.8)           | 51 (12.8)                    | 23 (16.7)           | 28 (10.8)           |
| Overweight (BMI ≥25.0 to <30.0)                        | 24 (30.4)                      | 1 (50.0)            | 23 (29.9)           | 15 (9.8)                       | 1 (4.2)             | 14 (10.9)           | 39 (29.8)                    | 12 (33.3)           | 27 (28.4)           | 54 (13.6)                    | 19 (13.8)           | 35 (13.5)           |
| Obese (BMI ≥30.0)                                      | 37 (46.8)                      | 1 (50.0)            | 36 (46.8)           | 9 (5.9)                        | 1 (4.2)             | 8 (6.2)             | 24 (18.3)                    | 5 (13.9)            | 19 (20.0)           | 58 (14.6)                    | 17 (12.3)           | 41 (15.8)           |
| No information                                         | 0                              | 0                   | 0                   | 0                              | 0                   | 0                   | 0                            | 0                   | 0                   | 7 (1.8)                      | 1 (0.7)             | 6 (2.3)             |
| Missing                                                | 5 (6.3)                        | 0                   | 5 (6.5)             | 118 (77.1)                     | 19 (79.2)           | 99 (76.7)           | 14 (10.7)                    | 0                   | 14 (14.7)           | 227 (57.0)                   | 78 (56.5)           | 149 (57.3)          |
| <b>Number of chronic conditions</b>                    |                                |                     |                     |                                |                     |                     |                              |                     |                     |                              |                     |                     |
| 0                                                      | 27 (34.2)                      | 0                   | 27 (35.1)           | 82 (53.6)                      | 7 (29.2)            | 75 (58.1)           | 61 (46.6)                    | 17 (47.2)           | 44 (46.3)           | 149 (37.4)                   | 30 (21.7)           | 119 (45.8)          |
| 1                                                      | 14 (17.7)                      | 0                   | 14 (18.2)           | 23 (15.0)                      | 6 (25.0)            | 17 (13.2)           | 30 (22.9)                    | 9 (25.0)            | 21 (22.1)           | 89 (22.4)                    | 29 (21.0)           | 60 (23.1)           |
| 2                                                      | 14 (17.7)                      | 0                   | 14 (18.2)           | 23 (15.0)                      | 4 (16.7)            | 19 (14.7)           | 23 (17.6)                    | 7 (19.4)            | 16 (16.8)           | 79 (19.8)                    | 35 (25.4)           | 44 (16.9)           |
| ≥3                                                     | 24 (30.4)                      | 2 (100)             | 22 (28.6)           | 25 (16.3)                      | 7 (29.2)            | 18 (14.0)           | 17 (13.0)                    | 3 (8.3)             | 14 (14.7)           | 81 (20.4)                    | 44 (31.9)           | 37 (14.2)           |
| <b>Participants with chronic condition<sup>a</sup></b> |                                |                     |                     |                                |                     |                     |                              |                     |                     |                              |                     |                     |
| Asthma                                                 | 6 (7.6)                        | 0                   | 6 (7.8)             | 8 (5.2)                        | 4 (16.7)            | 4 (3.1)             | 5 (3.8)                      | 1 (2.8)             | 4 (4.2)             | 29 (7.3)                     | 17 (12.3)           | 12 (4.6%)           |
| Lung disease                                           | 14 (17.7)                      | 1 (50.0)            | 13 (16.9)           | 22 (14.4)                      | 8 (33.3)            | 14 (10.9)           | 17 (13.0)                    | 7 (19.4)            | 10 (10.5)           | 85 (21.4)                    | 47 (34.1)           | 38 (14.6)           |
| Cardiovascular disease                                 | 20 (25.3)                      | 2 (100)             | 18 (23.4)           | 24 (15.7)                      | 7 (29.2)            | 17 (13.2)           | 32 (24.4)                    | 9 (25.0)            | 23 (24.2)           | 90 (22.6)                    | 45 (32.6)           | 45 (17.3)           |
| Hypertension                                           | 47 (59.5)                      | 2 (100)             | 45 (58.4)           | 27 (17.6)                      | 7 (29.1)            | 20 (15.5)           | 40 (30.5)                    | 7 (19.4)            | 33 (34.7)           | 138 (34.7)                   | 53 (38.4)           | 85 (32.7)           |
| Chronic liver disease                                  | 4 (5.1)                        | 0                   | 4 (5.2)             | 8 (5.2)                        | 1 (4.2)             | 7 (5.4)             | 4 (3.1)                      | 1 (2.8)             | 3 (3.2)             | 16 (4.0)                     | 7 (5.1)             | 9 (3.5)             |
| Chronic kidney disease                                 | 9 (11.4)                       | 0                   | 9 (11.7)            | 17 (11.1)                      | 5 (20.8)            | 12 (9.3)            | 6 (4.6)                      | 2 (5.6)             | 4 (4.2)             | 36 (9.0)                     | 19 (13.8)           | 17 (6.5)            |
| Type 2 diabetes                                        | 23 (29.1)                      | 0                   | 23 (29.9)           | 26 (17.0)                      | 4 (16.7)            | 22 (17.1)           | 16 (12.2)                    | 1 (2.8)             | 15 (15.8)           | 68 (17.1)                    | 24 (17.4)           | 44 (16.9)           |
| Cancer                                                 | 4 (5.1)                        | 1 (50.0)            | 3 (3.9)             | 15 (9.8)                       | 3 (12.5)            | 12 (9.3)            | 13 (9.9)                     | 5 (13.9)            | 8 (8.4)             | 39 (9.8)                     | 25 (18.1)           | 14 (5.4)            |
| Immunodeficiency (or organ transplant)                 | 5 (6.3)                        | 1 (50.0)            | 4 (5.2)             | 18 (11.8)                      | 2 (8.3)             | 16 (12.4)           | 2 (1.5)                      | 1 (2.8)             | 1 (1.1)             | 28 (7.0)                     | 20 (14.5)           | 8 (3.1)             |
| <b>Pregnancy</b>                                       | n=40                           | n=1                 | n=39                | n=63                           | n=9                 | n=54                | n=55                         | n=14                | n=41                | n=165                        | n=54                | n=111               |
| No                                                     | 29 (72.5)                      | 1 (100)             | 28 (71.8)           | 56 (88.9)                      | 8 (88.9)            | 48 (88.9)           | 53 (96.4)                    | 13 (92.9)           | 40 (97.6)           | 150 (90.9)                   | 54 (100)            | 96 (86.5)           |

| Characteristic                                                                    | Austria<br>(Jun 2021–Sep 2022) |              |               | Belgium<br>(Jun 2021–Sep 2022) |               |                | Italy<br>(Nov 2021–Sep 2022) |               |               | Spain<br>(Jul 2021–Sep 2022) |                |                |
|-----------------------------------------------------------------------------------|--------------------------------|--------------|---------------|--------------------------------|---------------|----------------|------------------------------|---------------|---------------|------------------------------|----------------|----------------|
|                                                                                   | Total<br>(N=79)                | TNC<br>(n=2) | TPC<br>(n=77) | Total<br>(N=153)               | TNC<br>(n=24) | TPC<br>(n=129) | Total<br>(N=131)             | TNC<br>(n=36) | TPC<br>(n=95) | Total<br>(N=398)             | TNC<br>(n=138) | TPC<br>(n=260) |
|                                                                                   | Yes                            | 2 (5.0)      | 0             | 2 (5.1)                        | 7 (11.1)      | 1 (11.1)       | 6 (11.1)                     | 1 (1.8)       | 0             | 1 (2.4)                      | 12 (7.3)       | 0              |
| No information                                                                    | 9 (22.5)                       | 0            | 9 (23.1)      | 0                              | 0             | 0              | 1 (1.8)                      | 1 (7.1)       | 0             | 0                            | 0              | 0              |
| Missing                                                                           | 0                              | 0            | 0             | 0                              | 0             | 0              | 0                            | 0             | 0             | 3 (1.8)                      | 0              | 3 (2.7)        |
| <b>Prior SARS-CoV-2 infection<sup>b</sup></b>                                     |                                |              |               |                                |               |                |                              |               |               |                              |                |                |
| No prior infection                                                                | 78 (98.7)                      | 2 (100)      | 76 (98.7)     | 145 (94.8)                     | 21 (87.5)     | 124 (96.1)     | 123 (93.9)                   | 33 (91.7)     | 90 (94.7)     | 157 (39.4)                   | 64 (46.4)      | 93 (35.8)      |
| Yes – clinical diagnosis                                                          | 0                              | 0            | 0             | 1 (0.7)                        | 0             | 1 (0.8)        | 2 (1.5)                      | 1 (2.8)       | 1 (1.1)       | 0                            | 0              | 0              |
| Yes – laboratory-confirmed                                                        | 1 (1.3)                        | 0            | 1 (1.3)       | 2 (1.3)                        | 1 (4.2)       | 1 (0.8)        | 4 (3.1)                      | 2 (5.6)       | 2 (2.1)       | 12 (3.0)                     | 10 (7.2)       | 2 (0.8)        |
| No information                                                                    | 0                              | 0            | 0             | 0                              | 0             | 0              | 2 (1.5)                      | 0             | 2 (2.1)       | 0                            | 0              | 0              |
| Missing                                                                           | 0                              | 0            | 0             | 5 (3.3)                        | 2 (8.3)       | 3 (2.3)        | 0                            | 0             | 0             | 229 (57.5)                   | 64 (46.4)      | 165 (63.5)     |
| <b>Vaccinated for influenza within 12 months prior to SARI hospital admission</b> |                                |              |               |                                |               |                |                              |               |               |                              |                |                |
| No                                                                                | 13 (16.5)                      | 1 (50.0)     | 12 (15.6)     | 51 (33.3)                      | 16 (66.7)     | 35 (27.1)      | 117 (89.3)                   | 32 (88.9)     | 85 (89.5)     | 304 (76.4)                   | 95 (68.8)      | 209 (80.4)     |
| Yes                                                                               | 1 (1.3)                        | 1 (50.0)     | 0             | 5 (3.3)                        | 1 (4.2)       | 4 (3.1)        | 9 (6.9)                      | 3 (8.3)       | 6 (6.3)       | 57 (14.3)                    | 30 (21.7)      | 27 (10.4)      |
| No information                                                                    | 65 (82.3)                      | 0            | 65 (84.4)     | 97 (63.4)                      | 7 (29.2)      | 90 (69.8)      | 5 (3.8)                      | 1 (2.8)       | 4 (4.2)       | 18 (4.5)                     | 11 (8.0)       | 7 (2.7)        |
| Missing                                                                           | 0                              | 0            | 0             | 0                              | 0             | 0              | 0                            | 0             | 0             | 19 (4.8)                     | 2 (1.4)        | 17 (6.5)       |
| <b>Received any pneumococcal vaccine</b>                                          |                                |              |               |                                |               |                |                              |               |               |                              |                |                |
| No                                                                                | 8 (10.1)                       | 1 (50.0)     | 7 (9.1)       | 51 (33.3)                      | 14 (58.3)     | 37 (28.7)      | 122 (93.1)                   | 33 (91.7)     | 89 (93.7)     | 302 (75.9)                   | 91 (65.9)      | 211 (81.2)     |
| Yes                                                                               | 1 (1.3)                        | 1 (50.0)     | 0             | 6 (3.9)                        | 3 (12.5)      | 3 (2.3)        | 1 (0.8)                      | 1 (2.8)       | 0             | 58 (14.6)                    | 34 (24.6)      | 24 (9.2)       |
| No information                                                                    | 70 (88.6)                      | 0            | 70 (90.9)     | 96 (62.7)                      | 7 (29.2)      | 89 (69.0)      | 8 (6.1)                      | 2 (5.6)       | 6 (6.3)       | 20 (5.0)                     | 11 (8.0)       | 9 (3.5)        |
| Missing                                                                           | 0                              | 0            | 0             | 0                              | 0             | 0              | 0                            | 0             | 0             | 18 (4.5)                     | 2 (1.4)        | 16 (6.2)       |
| <b>Smoking history</b>                                                            |                                |              |               |                                |               |                |                              |               |               |                              |                |                |
| Never smoked                                                                      | 22 (27.8)                      | 0            | 22 (28.6)     | 31 (20.3)                      | 5 (20.8)      | 26 (20.2)      | 44 (33.6)                    | 3 (8.3)       | 41 (43.2)     | 161 (10.5)                   | 39 (28.3)      | 122 (46.9)     |
| Ex-smoker                                                                         | 7 (8.9)                        | 2 (100)      | 5 (6.5)       | 12 (7.8)                       | 3 (12.5)      | 9 (7.0)        | 27 (20.6)                    | 2 (5.6)       | 25 (26.3)     | 104 (26.1)                   | 42 (30.4)      | 62 (23.8)      |
| Occasional smoker                                                                 | 1 (1.3)                        | 0            | 1 (1.3)       | 2 (1.3)                        | 0             | 2 (1.6)        | 2 (1.5)                      | 1 (2.8)       | 1 (1.1)       | 8 (2.0)                      | 6 (4.3)        | 2 (0.8)        |
| Daily smoker                                                                      | 8 (10.1)                       | 0            | 8 (10.4)      | 12 (7.8)                       | 7 (29.2)      | 5 (3.9)        | 15 (11.5)                    | 5 (13.9)      | 10 (10.5)     | 53 (13.3)                    | 36 (26.1)      | 17 (6.5)       |
| No information                                                                    | 41 (51.9)                      | 0            | 41 (53.2)     | 94 (61.4)                      | 8 (33.3)      | 86 (66.7)      | 43 (32.8)                    | 25 (69.4)     | 18 (18.9)     | 65 (16.3)                    | 12 (8.7)       | 53 (20.4)      |
| Missing                                                                           | 0                              | 0            | 0             | 2 (1.3)                        | 1 (4.2)       | 1 (0.8)        | 0                            | 0             | 0             | 7 (1.8)                      | 3 (2.2)        | 4 (1.5)        |
| <b>Long-term care facility resident</b>                                           |                                |              |               |                                |               |                |                              |               |               |                              |                |                |
| No                                                                                | 77 (97.5)                      | 2 (100)      | 75 (97.4)     | 148 (95.7)                     | 23 (95.8)     | 125 (96.9)     | 130 (99.2)                   | 36 (100)      | 94 (98.9)     | 382 (96.0)                   | 129 (93.5)     | 253 (97.3)     |
| Yes                                                                               | 1 (1.3)                        | 0            | 1 (1.3)       | 1 (0.7)                        | 0             | 1 (0.8)        | 0                            | 0             | 0             | 2 (0.5)                      | 1 (0.7)        | 1 (0.4)        |
| No information                                                                    | 1 (1.3)                        | 0            | 1 (1.3)       | 2 (1.3)                        | 0             | 2 (1.6)        | 1 (0.8)                      | 0             | 1 (1.1)       | 7 (1.8)                      | 5 (3.6)        | 2 (0.8)        |
| Missing                                                                           | 0                              | 0            | 0             | 2 (1.3)                        | 1 (4.2)       | 1 (0.8)        | 0                            | 0             | 0             | 7 (1.8)                      | 3 (2.2)        | 4 (1.5)        |
| <b>Healthcare worker</b>                                                          |                                |              |               |                                |               |                |                              |               |               |                              |                |                |
| No                                                                                | 71 (89.9)                      | 2 (100)      | 69 (89.6)     | 137 (89.5)                     | 22 (91.7)     | 115 (89.1)     | 130 (99.2)                   | 36 (100)      | 94 (98.9)     | 245 (61.6)                   | 88 (63.8)      | 157 (60.4)     |

| Characteristic                               | Austria<br>(Jun 2021–Sep 2022) |              |               | Belgium<br>(Jun 2021–Sep 2022) |               |                | Italy<br>(Nov 2021–Sep 2022) |               |               | Spain<br>(Jul 2021–Sep 2022) |                |                |
|----------------------------------------------|--------------------------------|--------------|---------------|--------------------------------|---------------|----------------|------------------------------|---------------|---------------|------------------------------|----------------|----------------|
|                                              | Total<br>(N=79)                | TNC<br>(n=2) | TPC<br>(n=77) | Total<br>(N=153)               | TNC<br>(n=24) | TPC<br>(n=129) | Total<br>(N=131)             | TNC<br>(n=36) | TPC<br>(n=95) | Total<br>(N=398)             | TNC<br>(n=138) | TPC<br>(n=260) |
|                                              | Yes                            | 2 (2.5)      | 0             | 2 (2.6)                        | 0             | 0              | 0                            | 0             | 0             | 0                            | 0              | 0              |
| No information                               | 6 (7.6)                        | 0            | 6 (7.8)       | 13 (8.5)                       | 1 (4.2)       | 12 (9.3)       | 1 (0.8)                      | 0             | 1 (1.1)       | 147 (36.9)                   | 47 (34.1)      | 100 (38.5)     |
| Missing                                      | 0                              | 0            | 0             | 3 (2.0)                        | 1 (4.2)       | 2 (1.6)        | 0                            | 0             | 0             | 6 (1.5)                      | 3 (2.2)        | 3 (1.2)        |
| <b>Period of disease onset</b>               |                                |              |               |                                |               |                |                              |               |               |                              |                |                |
| May–Jun 2021                                 | 37 (46.8)                      | 0            | 37 (48.1)     | 10 (6.5)                       | 3 (12.5)      | 7 (5.4)        | 0                            | 0             | 0             | 8 (2.0)                      | 2 (1.4)        | 6 (2.3)        |
| Jul–Sep 2021                                 | 19 (24.1)                      | 0            | 19 (24.7)     | 56 (36.6)                      | 9 (37.5)      | 47 (36.4)      | 0                            | 0             | 0             | 67 (16.8)                    | 23 (16.7)      | 44 (16.9)      |
| Oct–Dec 2021                                 | 0                              | 0            | 0             | 71 (46.4)                      | 10 (41.7)     | 61 (47.3)      | 34 (26.0)                    | 1 (2.8)       | 33 (34.7)     | 202 (50.8)                   | 72 (52.2)      | 130 (50.0)     |
| Jan–Mar 2022                                 | 10 (12.7)                      | 0            | 10 (13.0)     | 15 (9.8)                       | 1 (4.2)       | 14 (10.9)      | 76 (58.0)                    | 27 (75.0)     | 49 (51.6)     | 87 (21.9)                    | 23 (16.7)      | 64 (24.6)      |
| Apr–Jun 2022                                 | 9 (11.4)                       | 2 (100)      | 7 (9.1)       | 0                              | 0             | 0              | 17 (13.0)                    | 8 (22.2)      | 9 (9.5)       | 29 (7.3)                     | 14 (10.1)      | 15 (5.8)       |
| Jul–Aug 2022                                 | 4 (5.1)                        | 0            | 4 (5.2)       | 1 (0.7)                        | 1 (4.2)       | 0              | 4 (3.1)                      | 0             | 4 (4.2)       | 5 (1.3)                      | 4 (2.9)        | 1 (0.4)        |
| <b>Genetic variant</b>                       | n=77                           | n/a          | n=77          | n=129                          | n/a           | n=129          | n=95                         | n/a           | n=95          | n=260                        | n/a            | n=260          |
| Alpha                                        | 0                              | 0            | 0             | 1 (0.8)                        | 0             | 1 (0.8)        | 0                            | 0             | 0             | 0                            | 0              | 0              |
| Beta                                         | 1 (1.3)                        | 0            | 1 (1.3)       | 0                              | 0             | 0              | 0                            | 0             | 0             | 0                            | 0              | 0              |
| Delta                                        | 0                              | 0            | 0             | 25 (19.4)                      | 0             | 25 (19.4)      | 19 (20.0)                    | 0             | 19 (20.0)     | 79 (30.4)                    | 0              | 79 (30.4)      |
| Omicron                                      | 0                              | 0            | 0             | 6 (4.7)                        | 0             | 6 (4.7)        | 26 (27.4)                    | 0             | 26 (27.4)     | 54 (20.8)                    | 0              | 54 (20.8)      |
| Not interpretable/unknown                    | 0                              | 0            | 0             | 0                              | 0             | 0              | 0                            | 0             | 0             | 2 (0.8)                      | 0              | 2 (0.8)        |
| Missing                                      | 76 (98.7)                      | 0            | 76 (98.7)     | 97 (75.2)                      | 0             | 97 (75.2)      | 50 (52.6)                    | 0             | 50 (52.6)     | 125 (48.1)                   | 0              | 125 (48.1)     |
| <b>Vaccinated against COVID-19</b>           |                                |              |               |                                |               |                |                              |               |               |                              |                |                |
| No                                           | 79 (100)                       | 2 (100)      | 77 (100)      | 136 (88.9)                     | 18 (75.0)     | 118 (91.5)     | 119                          | 32 (88.9)     | 87 (91.6)     | 307 (77.1)                   | 88 (63.8)      | 219 (84.2)     |
| Fully vaccinated with two doses of AZD1222   | 0                              | 0            | 0             | 17 (11.1)                      | 6 (25.0)      | 11 (8.5)       | 12                           | 4 (11.1)      | 8 (8.4)       | 91 (22.9)                    | 50 (36.2)      | 41 (15.8)      |
| <b>Month and year of second AZD1222 dose</b> | n=0                            | n=0          | n=0           | n=17                           | n=6           | n=11           | n=12                         | n=4           | n=8           | n=91                         | n=50           | n=41           |
| March 2021                                   | 0                              | 0            | 0             | 1 (5.9)                        | 0             | 1 (9.1)        | 0                            | 0             | 0             | 0                            | 0              | 0              |
| April 2021                                   | 0                              | 0            | 0             | 0                              | 0             | 0              | 0                            | 0             | 0             | 0                            | 0              | 0              |
| May 2021                                     | 0                              | 0            | 0             | 2 (11.8)                       | 1 (16.7)      | 1 (9.1)        | 3                            | 2 (50.0)      | 1 (12.5)      | 0                            | 0              | 0              |
| June 2021                                    | 0                              | 0            | 0             | 5 (29.4)                       | 3 (50.0)      | 2 (18.2)       | 1                            | 0             | 1 (12.5)      | 27 (29.7)                    | 16 (32.0)      | 11 (26.8)      |
| July 2021                                    | 0                              | 0            | 0             | 8 (47.1)                       | 1 (16.7)      | 7 (63.6)       | 6                            | 1 (25.0)      | 5 (62.5)      | 61 (67.0)                    | 32 (64.0)      | 29 (70.7)      |
| August 2021                                  | 0                              | 0            | 0             | 1 (5.9)                        | 1 (16.7)      | 0              | 2                            | 1 (25.0)      | 1 (12.5)      | 1 (1.1)                      | 1 (2.0)        | 0              |
| September 2021                               | 0                              | 0            | 0             | 0                              | 0             | 0              | 0                            | 0             | 0             | 2 (2.2)                      | 1 (2.0)        | 1 (2.4)        |

Data shown are n (%) or median (IQR).

<sup>a</sup>Participants with >1 chronic condition are included in each relevant category, and so the percentages for all categories sum to >100 within each column.

<sup>b</sup>As there is no linkage to national testing data, information about prior SARS-CoV-2 infection is reliant on hospital records and patient recall.

COVID-19=coronavirus disease 2019. IQR=interquartile range. SARI=severe acute respiratory infection. SARS-CoV-2=severe acute respiratory syndrome coronavirus 2. TNC=test-negative controls.

TPC=test-positive cases.

**Table S3: Demographic characteristics of the study population, stratified by SARS-CoV-2 variant periods**

| Characteristic                                         | Jun 1–Jul 31, 2021<br>(Alpha, Delta) |                     |                     | Aug 1–Nov 30 2021<br>(Delta) |                     |                     | Dec 1–31, 2021<br>(Delta, Omicron clade 21K<br>[BA.1]) |                     |                     | Jan 1–Mar 31, 2022<br>(Mixed Omicron clades 21K<br>[BA.1], 21L [BA.2]) |                     |                     | April 1–Sep 5, 2022<br>(Mixed Omicron clades 21L<br>[BA.2], 22A [BA.4], 22B [BA.5],<br>22C [BA.2.12.1], 22D [BA.2.75]) |                     |                     |
|--------------------------------------------------------|--------------------------------------|---------------------|---------------------|------------------------------|---------------------|---------------------|--------------------------------------------------------|---------------------|---------------------|------------------------------------------------------------------------|---------------------|---------------------|------------------------------------------------------------------------------------------------------------------------|---------------------|---------------------|
|                                                        | Total<br>(N=84)                      | TNC<br>(n=19)       | TPC<br>(n=65)       | Total<br>(N=221)             | TNC<br>(n=75)       | TPC<br>(n=146)      | Total<br>(N=144)                                       | TNC<br>(n=21)       | TPC<br>(n=123)      | Total<br>(N=188)                                                       | TNC<br>(n=51)       | TPC<br>(n=137)      | Total<br>(N=69)                                                                                                        | TNC<br>(n=29)       | TPC<br>(n=40)       |
|                                                        |                                      |                     |                     |                              |                     |                     |                                                        |                     |                     |                                                                        |                     |                     |                                                                                                                        |                     |                     |
| <b>Age at hospitalisation, years</b>                   | 55.0<br>(37.8–65.0)                  | 63.0<br>(57.0–78.5) | 50.0<br>(37.0–59.0) | 57.0<br>(44.0–67.0)          | 65.0<br>(55.0–69.0) | 51.5<br>(41.0–63.8) | 61.5<br>(48.8–68.0)                                    | 65.0<br>(54.0–68.0) | 61.0<br>(44.5–68.0) | 63.5<br>(50.8–75.2)                                                    | 59.0<br>(45.5–69.0) | 66.0<br>(52.0–77.0) | 70.0<br>(58.0–80.0)                                                                                                    | 66.0<br>(49.0–76.0) | 72.0<br>(61.5–80.0) |
| 18–49                                                  | 35 (41.7)                            | 4 (21.1)            | 31 (47.7)           | 80 (36.2)                    | 16 (21.3)           | 64 (43.8)           | 41 (28.5)                                              | 3 (14.3)            | 38 (30.9)           | 45 (23.9)                                                              | 18 (35.3)           | 27 (19.7)           | 13 (18.8)                                                                                                              | 8 (27.6)            | 5 (12.5)            |
| 50–64                                                  | 27 (32.1)                            | 6 (31.6)            | 21 (32.2)           | 68 (30.8)                    | 21 (28.0)           | 47 (32.2)           | 51 (35.4)                                              | 6 (28.6)            | 45 (36.6)           | 52 (27.7)                                                              | 15 (29.4)           | 37 (27.0)           | 15 (21.7)                                                                                                              | 6 (20.7)            | 9 (22.5)            |
| ≥65                                                    | 22 (26.2)                            | 9 (47.4)            | 13 (20.0)           | 73 (33.0)                    | 38 (50.7)           | 35 (24.0)           | 52 (36.1)                                              | 12 (57.1)           | 40 (32.5)           | 91 (48.4)                                                              | 18 (35.3)           | 73 (53.3)           | 41 (59.4)                                                                                                              | 15 (51.7)           | 26 (65.0)           |
| <b>Sex</b>                                             |                                      |                     |                     |                              |                     |                     |                                                        |                     |                     |                                                                        |                     |                     |                                                                                                                        |                     |                     |
| Female                                                 | 36 (42.9)                            | 6 (31.6)            | 30 (46.2)           | 94 (42.5)                    | 31 (41.3)           | 63 (43.2)           | 60 (41.7)                                              | 10 (47.6)           | 50 (40.7)           | 74 (39.4)                                                              | 18 (35.3)           | 56 (40.9)           | 33 (47.8)                                                                                                              | 12 (41.4)           | 21 (52.5)           |
| Male                                                   | 48 (57.1)                            | 13 (68.4)           | 35 (53.8)           | 127 (57.5)                   | 44 (58.7)           | 83 (56.8)           | 84 (58.3)                                              | 11 (52.4)           | 73 (59.3)           | 114 (60.6)                                                             | 33 (64.7)           | 81 (59.1)           | 36 (52.2)                                                                                                              | 17 (58.6)           | 19 (47.5)           |
| <b>Country</b>                                         |                                      |                     |                     |                              |                     |                     |                                                        |                     |                     |                                                                        |                     |                     |                                                                                                                        |                     |                     |
| Austria                                                | 19 (22.6)                            | 0                   | 19 (29.2)           | 0                            | 0                   | 0                   | 0                                                      | 0                   | 0                   | 10 (5.3)                                                               | 0                   | 10 (7.3)            | 13 (18.8)                                                                                                              | 2 (6.9)             | 11 (27.5)           |
| Belgium                                                | 14 (16.7)                            | 4 (21.1)            | 10 (15.4)           | 92 (41.6)                    | 12 (16.0)           | 80 (54.8)           | 21 (14.6)                                              | 3 (14.3)            | 18 (14.6)           | 15 (8.0)                                                               | 1 (2.0)             | 14 (10.2)           | 1 (1.4)                                                                                                                | 1 (3.4)             | 0                   |
| Italy                                                  | 0                                    | 0                   | 0                   | 8 (3.6)                      | 0                   | 8 (5.5)             | 26 (18.1)                                              | 1 (4.8)             | 25 (20.3)           | 76 (40.4)                                                              | 27 (52.9)           | 49 (35.8)           | 21 (30.4)                                                                                                              | 8 (27.6)            | 13 (32.5)           |
| Spain                                                  | 51 (60.7)                            | 15 (78.9)           | 36 (55.4)           | 121 (54.8)                   | 63 (84.0)           | 58 (49.7)           | 97 (67.4)                                              | 17 (81.0)           | 80 (65.0)           | 87 (46.3)                                                              | 23 (45.1)           | 64 (46.7)           | 34 (49.3)                                                                                                              | 18 (62.1)           | 16 (40.0)           |
| <b>Body mass index (BMI) category</b>                  |                                      |                     |                     |                              |                     |                     |                                                        |                     |                     |                                                                        |                     |                     |                                                                                                                        |                     |                     |
| Underweight (BMI <18.5)                                | 0                                    | 0 (0%)              | 0                   | 2 (0.9)                      | 0                   | 2 (1.4)             | 0                                                      | 0                   | 0                   | 3 (1.6)                                                                | 1 (2.0)             | 2 (1.5)             | 0                                                                                                                      | 0                   | 0                   |
| Normal/healthy weight (BMI ≥18.5 to <25.0)             | 8 (9.5)                              | 2 (10.5)            | 6 (9.2)             | 23 (10.4)                    | 7 (9.3)             | 16 (11.0)           | 12 (8.3)                                               | 1 (4.8)             | 11 (8.9)            | 50 (26.6)                                                              | 24 (47.1)           | 26 (19.0)           | 28 (40.6)                                                                                                              | 10 (34.5)           | 18 (45.0)           |
| Overweight (BMI ≥25.0 to <30.0)                        | 8 (9.5)                              | 1 (5.3)             | 7 (10.8)            | 35 (15.8)                    | 7 (9.3)             | 28 (19.2)           | 22 (15.3)                                              | 4 (19.0)            | 18 (14.6)           | 42 (22.3)                                                              | 13 (25.5)           | 29 (21.2)           | 18 (26.1)                                                                                                              | 8 (27.6)            | 10 (25.0)           |
| Obese (BMI ≥30.0)                                      | 14 (16.7)                            | 2 (10.5)            | 12 (18.5)           | 25 (11.3)                    | 6 (8.0)             | 19 (13.0)           | 18 (12.5)                                              | 1 (4.8)             | 17 (13.8)           | 32 (17.0)                                                              | 6 (11.8)            | 26 (19.0)           | 15 (21.7)                                                                                                              | 9 (31.0)            | 6 (15.0)            |
| No information                                         | 0                                    | 0                   | 0                   | 1 (0.5)                      | 1 (1.3)             | 0                   | 3 (2.1)                                                | 0                   | 3 (2.4)             | 3 (1.6)                                                                | 0                   | 3 (2.2)             | 0                                                                                                                      | 0                   | 0                   |
| Missing                                                | 54 (64.3)                            | 14 (73.7)           | 40 (61.5)           | 135 (61.1)                   | 54 (72.0)           | 81 (55.5)           | 89 (61.8)                                              | 15 (71.4)           | 74 (60.2)           | 58 (30.9)                                                              | 7 (13.7)            | 51 (37.2)           | 8 (11.6)                                                                                                               | 2 (6.9)             | 6 (15.0)            |
| <b>Number of chronic conditions</b>                    |                                      |                     |                     |                              |                     |                     |                                                        |                     |                     |                                                                        |                     |                     |                                                                                                                        |                     |                     |
| 0                                                      | 39 (46.4)                            | 4 (21.1)            | 35 (53.8)           | 97 (43.9)                    | 15 (20.0)           | 82 (56.2)           | 64 (44.4)                                              | 3 (14.3)            | 61 (49.6)           | 71 (37.8)                                                              | 19 (37.3)           | 52 (38.0)           | 21 (30.4)                                                                                                              | 9 (31.0)            | 12 (30.0)           |
| 1                                                      | 13 (15.5)                            | 4 (21.1)            | 9 (13.8)            | 40 (18.1)                    | 16 (21.2)           | 24 (16.4)           | 24 (16.7)                                              | 3 (14.3)            | 21 (17.1)           | 44 (23.4)                                                              | 12 (23.5)           | 32 (23.4)           | 14 (20.3)                                                                                                              | 6 (20.7)            | 8 (20.0)            |
| 2                                                      | 15 (17.9)                            | 3 (15.8)            | 12 (18.5)           | 43 (19.5)                    | 20 (26.7)           | 23 (15.8)           | 35 (24.3)                                              | 6 (28.6)            | 29 (23.6)           | 34 (18.1)                                                              | 12 (23.5)           | 22 (16.1)           | 16 (23.2)                                                                                                              | 8 (27.6)            | 8 (20.0)            |
| ≥3                                                     | 17 (20.2)                            | 8 (42.1)            | 9 (13.8)            | 41 (18.6)                    | 24 (32.0)           | 17 (11.6)           | 21 (14.6)                                              | 9 (42.9)            | 12 (9.8)            | 39 (20.7)                                                              | 8 (15.7)            | 31 (22.6)           | 18 (26.1)                                                                                                              | 6 (20.7)            | 12 (30.0)           |
| <b>Participants with chronic condition<sup>a</sup></b> |                                      |                     |                     |                              |                     |                     |                                                        |                     |                     |                                                                        |                     |                     |                                                                                                                        |                     |                     |
| Asthma                                                 | 7 (8.3)                              | 2 (10.5)            | 5 (7.7)             | 13 (5.9)                     | 8 (10.7)            | 5 (3.4)             | 8 (5.6)                                                | 4 (19.0)            | 4 (3.3)             | 12 (6.4)                                                               | 5 (9.8)             | 7 (5.1)             | 4 (5.8)                                                                                                                | 2 (6.9)             | 2 (5.0)             |
| Lung disease                                           | 18 (21.4)                            | 9 (47.4)            | 9 (13.8)            | 36 (16.3)                    | 22 (29.2)           | 14 (9.6)            | 23 (16.0)                                              | 9 (42.9)            | 14 (11.4)           | 34 (18.1)                                                              | 13 (25.5)           | 21 (15.3)           | 18 (26.1)                                                                                                              | 9 (31.0)            | 9 (22.5)            |
| Cardiovascular disease                                 | 14 (16.7)                            | 5 (26.3)            | 9 (13.8)            | 43 (19.5)                    | 25 (33.3)           | 18 (12.3)           | 29 (20.1)                                              | 10 (47.6)           | 19 (15.4)           | 48 (25.5)                                                              | 13 (25.5)           | 35 (25.5)           | 25 (36.2)                                                                                                              | 9 (31.0)            | 16 (40.0)           |
| Hypertension                                           | 25 (29.8)                            | 7 (36.8)            | 18 (27.7)           | 60 (27.1)                    | 28 (37.3)           | 32 (21.9)           | 44 (30.6)                                              | 9 (42.9)            | 35 (28.5)           | 65 (34.6)                                                              | 12 (23.5)           | 53 (38.7)           | 33 (47.8)                                                                                                              | 12 (41.4)           | 21 (52.5)           |
| Chronic liver disease                                  | 4 (4.8)                              | 1 (5.3)             | 3 (4.6)             | 12 (5.4)                     | 7 (9.2)             | 5 (3.4)             | 3 (2.1)                                                | 0                   | 3 (2.4)             | 10 (5.3)                                                               | 1 (2.0)             | 9 (6.6)             | 2 (2.9)                                                                                                                | 0                   | 2 (5.0)             |
| Chronic kidney disease                                 | 12 (14.3)                            | 6 (31.6)            | 6 (9.2)             | 18 (8.1)                     | 12 (16.0)           | 6 (4.1)             | 7 (4.9)                                                | 2 (9.5)             | 5 (4.1)             | 23 (12.2)                                                              | 4 (7.8)             | 19 (13.9)           | 3 (4.3)                                                                                                                | 2 (6.9)             | 1 (2.5)             |
| Type 2 diabetes                                        | 12 (14.3)                            | 4 (21.1)            | 8 (12.3)            | 43 (19.5)                    | 15 (20.0)           | 28 (19.2)           | 19 (13.2)                                              | 3 (14.3)            | 16 (13.0)           | 34 (18.1)                                                              | 4 (7.8)             | 30 (21.9)           | 10 (14.5)                                                                                                              | 2 (6.9)             | 8 (20.0)            |
| Cancer                                                 | 8 (9.5)                              | 3 (15.8)            | 5 (7.7)             | 26 (11.8)                    | 14 (18.7)           | 12 (8.2)            | 12 (8.3)                                               | 6 (28.6)            | 6 (4.9)             | 19 (10.1)                                                              | 8 (15.7)            | 11 (8.0)            | 6 (8.7)                                                                                                                | 3 (10.3)            | 3 (7.5)             |
| Immunodeficiency (or organ transplant)                 | 4 (4.8)                              | 1 (5.3)             | 3 (4.6)             | 27 (12.2)                    | 14 (18.7)           | 13 (8.9)            | 9 (6.3)                                                | 3 (14.3)            | 6 (4.9)             | 7 (3.7)                                                                | 3 (5.9)             | 4 (2.9)             | 5 (7.2)                                                                                                                | 3 (10.3)            | 2 (5.0)             |

| Characteristic                                                                        | Jun 1–Jul 31, 2021<br>(Alpha, Delta) |           |           | Aug 1–Nov 30 2021<br>(Delta) |           |            | Dec 1–31, 2021<br>(Delta, Omicron clade 21K<br>[BA.1]) |           |            | Jan 1–Mar 31, 2022<br>(Mixed Omicron clades 21K<br>[BA.1], 21L [BA.2]) |           |            | April 1–Sep 5, 2022<br>(Mixed Omicron clades 21L<br>[BA.2], 22A [BA.4], 22B [BA.5],<br>22C [BA.2.12.1], 22D [BA.2.75]) |           |           |
|---------------------------------------------------------------------------------------|--------------------------------------|-----------|-----------|------------------------------|-----------|------------|--------------------------------------------------------|-----------|------------|------------------------------------------------------------------------|-----------|------------|------------------------------------------------------------------------------------------------------------------------|-----------|-----------|
|                                                                                       | Total                                | TNC       | TPC       | Total                        | TNC       | TPC        | Total                                                  | TNC       | TPC        | Total                                                                  | TNC       | TPC        | Total                                                                                                                  | TNC       | TPC       |
|                                                                                       | (N=84)                               | (n=19)    | (n=65)    | (N=221)                      | (n=75)    | (n=146)    | (N=144)                                                | (n=21)    | (n=123)    | (N=188)                                                                | (n=51)    | (n=137)    | (N=69)                                                                                                                 | (n=29)    | (n=40)    |
| <b>Pregnancy</b>                                                                      | n=36                                 | n=6       | n=30      | n=94                         | n=31      | n=63       | n=60                                                   | n=10      | n=50       | n=74                                                                   | n=18      | n=56       | n=33                                                                                                                   | n=12      | n=21      |
| No                                                                                    | 33 (91.7)                            | 6 (100)   | 27 (90.0) | 87 (92.6)                    | 30 (96.8) | 57 (90.5)  | 55 (91.7)                                              | 10 (100)  | 45 (90.0)  | 65 (87.8)                                                              | 17 (94.4) | 48 (85.7)  | 31 (93.9)                                                                                                              | 12 (100)  | 19 (90.5) |
| Yes                                                                                   | 1 (2.8)                              | 0         | 1 (3.3)   | 7 (7.4)                      | 1 (3.2)   | 6 (9.5)    | 4 (6.7)                                                | 0         | 4 (8.0)    | 6 (8.1)                                                                | 0         | 6 (10.7)   | 2 (6.1)                                                                                                                | 0         | 2 (9.5)   |
| No information                                                                        | 0                                    | 0         | 0         | 0                            | 0         | 0          | 0                                                      | 0         | 0          | 1 (1.4)                                                                | 1 (5.6)   | 0          | 0                                                                                                                      | 0         | 0         |
| Missing                                                                               | 2 (5.6)                              | 0         | 2 (6.7)   | 0                            | 0         | 0          | 1 (1.7)                                                | 0         | 1 (2.0)    | 2 (2.7)                                                                | 0         | 2 (3.6)    | 0                                                                                                                      | 0         | 0         |
| <b>Prior SARS-CoV-2 infection<sup>b</sup></b>                                         |                                      |           |           |                              |           |            |                                                        |           |            |                                                                        |           |            |                                                                                                                        |           |           |
| No prior infection                                                                    | 81 (96.4)                            | 16 (84.2) | 65 (100)  | 145 (65.6)                   | 48 (64.0) | 97 (66.4)  | 76 (52.8)                                              | 9 (42.9)  | 67 (54.5)  | 115 (61.2)                                                             | 31 (60.8) | 84 (61.3)  | 32 (46.4)                                                                                                              | 11 (37.9) | 21 (52.5) |
| Yes – clinical diagnosis                                                              | 0                                    | 0         | 0         | 0                            | 0         | 0          | 1 (0.7)                                                | 0         | 1 (0.8)    | 2 (1.1)                                                                | 1 (2.0)   | 1 (0.7)    | 0                                                                                                                      | 0         | 0         |
| Yes – laboratory-confirmed                                                            | 3 (3.6)                              | 3 (15.8)  | 0         | 5 (2.3)                      | 3 (4.0)   | 2 (1.4)    | 2 (1.4)                                                | 2 (9.5)   | 0          | 5 (2.7)                                                                | 3 (5.9)   | 2 (1.5)    | 4 (5.8)                                                                                                                | 2 (6.9)   | 2 (5.0)   |
| No information                                                                        | 0                                    | 0         | 0         | 0                            | 0         | 0          | 0                                                      | 0         | 0          | 1 (0.5)                                                                | 0         | 1 (0.7)    | 1 (1.4)                                                                                                                | 0         | 1 (2.5)   |
| Missing                                                                               | 0                                    | 0         | 0         | 71 (32.1)                    | 24 (32.0) | 47 (32.2)  | 65 (45.1)                                              | 10 (47.6) | 55 (44.7)  | 65 (34.6)                                                              | 16 (31.4) | 49 (35.8)  | 32 (46.4)                                                                                                              | 16 (55.2) | 16 (40.0) |
| <b>Vaccinated for influenza within 12 months<br/>prior to SARI hospital admission</b> |                                      |           |           |                              |           |            |                                                        |           |            |                                                                        |           |            |                                                                                                                        |           |           |
| No                                                                                    | 51 (60.7)                            | 13 (68.4) | 38 (58.5) | 110 (49.8)                   | 38 (50.7) | 72 (49.3)  | 98 (68.1)                                              | 15 (71.4) | 83 (67.5)  | 153 (81.4)                                                             | 48 (94.1) | 105 (76.6) | 58 (84.1)                                                                                                              | 26 (89.7) | 32 (80.0) |
| Yes                                                                                   | 10 (11.9)                            | 6 (31.6)  | 4 (6.2)   | 30 (13.6)                    | 19 (25.2) | 11 (7.5)   | 16 (11.1)                                              | 5 (23.8)  | 11 (8.9)   | 9 (4.8)                                                                | 3 (5.9)   | 6 (4.4)    | 7 (10.1)                                                                                                               | 2 (6.9)   | 5 (12.5)  |
| No information                                                                        | 23 (27.4)                            | 0         | 23 (35.4) | 76 (34.4)                    | 16 (21.3) | 60 (41.1)  | 23 (16.0)                                              | 1 (4.8)   | 22 (17.9)  | 19 (10.1)                                                              | 0         | 19 (13.9)  | 4 (5.8)                                                                                                                | 1 (3.4)   | 3 (7.5)   |
| Missing                                                                               | 0                                    | 0         | 0         | 5 (2.3)                      | 2 (2.7)   | 3 (2.1)    | 7 (4.9)                                                | 0         | 7 (5.7)    | 7 (3.7)                                                                | 0         | 7 (5.1)    | 0                                                                                                                      | 0         | 0         |
| <b>Received any pneumococcal vaccine</b>                                              |                                      |           |           |                              |           |            |                                                        |           |            |                                                                        |           |            |                                                                                                                        |           |           |
| No                                                                                    | 49 (58.3)                            | 12 (63.2) | 37 (56.9) | 112 (50.7)                   | 35 (46.7) | 77 (52.7)  | 105 (72.9)                                             | 16 (76.2) | 89 (72.4)  | 147 (78.2)                                                             | 46 (90.2) | 101 (73.7) | 55 (79.7)                                                                                                              | 26 (89.7) | 29 (72.5) |
| Yes                                                                                   | 12 (14.3)                            | 7 (36.8)  | 5 (7.7)   | 29 (13.1)                    | 22 (29.3) | 7 (4.8)    | 6 (4.2)                                                | 4 (19.0)  | 2 (1.6)    | 14 (7.4)                                                               | 4 (7.8)   | 10 (7.3)   | 5 (7.2)                                                                                                                | 2 (6.9)   | 3 (7.5)   |
| No information                                                                        | 23 (27.4)                            | 0         | 23 (35.4) | 75 (33.9)                    | 16 (21.3) | 59 (40.4)  | 26 (18.1)                                              | 1 (4.8)   | 25 (20.3)  | 21 (11.2)                                                              | 1 (2.0)   | 20 (14.6)  | 9 (13.0)                                                                                                               | 1 (3.4)   | 8 (20.0)  |
| Missing                                                                               | 0                                    | 0         | 0         | 5 (2.3)                      | 2 (2.7)   | 3 (2.1)    | 7 (4.9)                                                | 0         | 7 (5.7)    | 6 (3.2)                                                                | 0         | 6 (4.4)    | 0                                                                                                                      | 0         | 0         |
| <b>Smoking history</b>                                                                |                                      |           |           |                              |           |            |                                                        |           |            |                                                                        |           |            |                                                                                                                        |           |           |
| Never smoked                                                                          | 19 (22.6)                            | 4 (21.1)  | 15 (23.1) | 71 (32.1)                    | 23 (30.7) | 48 (32.9)  | 65 (45.1)                                              | 5 (23.8)  | 60 (48.8)  | 65 (34.6)                                                              | 11 (21.6) | 54 (39.4)  | 22 (31.9)                                                                                                              | 3 (10.3)  | 19 (47.5) |
| Ex-smoker                                                                             | 12 (14.3)                            | 5 (26.3)  | 7 (10.8)  | 36 (16.3)                    | 15 (20.0) | 21 (14.4)  | 37 (25.7)                                              | 8 (38.1)  | 29 (23.6)  | 39 (20.7)                                                              | 8 (15.7)  | 31 (22.6)  | 21 (30.4)                                                                                                              | 12 (41.4) | 9 (22.5)  |
| Occasional smoker                                                                     | 0                                    | 0         | 0         | 5 (2.3)                      | 2 (2.7)   | 3 (2.1)    | 1 (0.7)                                                | 1 (4.8)   | 0          | 4 (2.1)                                                                | 2 (3.9)   | 2 (1.5)    | 1 (1.4)                                                                                                                | 1 (3.4)   | 0         |
| Daily smoker                                                                          | 11 (13.1)                            | 5 (26.3)  | 6 (9.2)   | 26 (11.8)                    | 20 (26.7) | 6 (4.1)    | 13 (9.0)                                               | 7 (33.3)  | 6 (4.9)    | 15 (8.0)                                                               | 6 (11.8)  | 9 (6.6)    | 19 (27.5)                                                                                                              | 9 (31.0)  | 10 (25.0) |
| No information                                                                        | 42 (50.0)                            | 5 (26.3)  | 37 (56.9) | 76 (34.4)                    | 11 (14.7) | 65 (44.5)  | 27 (18.8)                                              | 0         | 27 (22.0)  | 64 (34.0)                                                              | 24 (47.1) | 40 (29.2)  | 6 (8.7)                                                                                                                | 4 (13.8)  | 2 (5.0)   |
| Missing                                                                               | 0                                    | 0         | 0         | 7 (3.2)                      | 4 (5.3)   | 3 (2.1)    | 1 (0.7)                                                | 0         | 1 (0.8)    | 1 (0.5)                                                                | 0         | 1 (0.7)    | 0                                                                                                                      | 0         | 0         |
| <b>Long-term care facility resident</b>                                               |                                      |           |           |                              |           |            |                                                        |           |            |                                                                        |           |            |                                                                                                                        |           |           |
| No                                                                                    | 78 (92.9)                            | 16 (84.2) | 62 (95.4) | 209 (94.6)                   | 68 (90.7) | 141 (96.6) | 142 (98.6)                                             | 21 (100)  | 121 (98.4) | 185 (98.4)                                                             | 51 (100)  | 134 (97.8) | 68 (98.6)                                                                                                              | 29 (100)  | 39 (97.5) |
| Yes                                                                                   | 1 (1.2)                              | 0         | 1 (1.5)   | 1 (0.5)                      | 1 (1.3)   | 0          | 0                                                      | 0         | 0          | 2 (1.1)                                                                | 0         | 2 (1.5)    | 0                                                                                                                      | 0         | 0         |
| No information                                                                        | 5 (6.0)                              | 3 (15.8)  | 2 (3.1)   | 4 (1.8)                      | 2 (2.7)   | 2 (1.4)    | 1 (0.7)                                                | 0         | 1 (0.8)    | 0                                                                      | 0         | 0          | 1 (1.4)                                                                                                                | 0         | 1 (2.5)   |
| Missing                                                                               | 0                                    | 0         | 0         | 7 (3.2)                      | 4 (5.3)   | 3 (2.1)    | 1 (0.7)                                                | 0         | 1 (0.8)    | 1 (0.5)                                                                | 0         | 1 (0.7)    | 0                                                                                                                      | 0         | 0         |
| <b>Healthcare worker</b>                                                              |                                      |           |           |                              |           |            |                                                        |           |            |                                                                        |           |            |                                                                                                                        |           |           |
| No                                                                                    | 79 (94.0)                            | 19 (100)  | 60 (92.3) | 153 (69.2)                   | 56 (74.7) | 97 (66.4)  | 110 (76.4)                                             | 17 (81.0) | 93 (75.6)  | 150 (79.8)                                                             | 37 (72.5) | 113 (82.5) | 43 (62.3)                                                                                                              | 14 (48.3) | 29 (72.5) |
| Yes                                                                                   | 0                                    | 0         | 0         | 0                            | 0         | 0          | 0                                                      | 0         | 0          | 0                                                                      | 0         | 0          | 1 (1.4)                                                                                                                | 0         | 1 (2.5)   |

| Characteristic                               | Jun 1–Jul 31, 2021<br>(Alpha, Delta) |               |               | Aug 1–Nov 30 2021<br>(Delta) |               |                | Dec 1–31, 2021<br>(Delta, Omicron clade 21K<br>[BA.1]) |               |                | Jan 1–Mar 31, 2022<br>(Mixed Omicron clades 21K<br>[BA.1], 21L [BA.2]) |               |                | April 1–Sep 5, 2022<br>(Mixed Omicron clades 21L<br>[BA.2], 22A [BA.4], 22B [BA.5],<br>22C [BA.2.12.1], 22D [BA.2.75]) |               |               |
|----------------------------------------------|--------------------------------------|---------------|---------------|------------------------------|---------------|----------------|--------------------------------------------------------|---------------|----------------|------------------------------------------------------------------------|---------------|----------------|------------------------------------------------------------------------------------------------------------------------|---------------|---------------|
|                                              | Total<br>(N=84)                      | TNC<br>(n=19) | TPC<br>(n=65) | Total<br>(N=221)             | TNC<br>(n=75) | TPC<br>(n=146) | Total<br>(N=144)                                       | TNC<br>(n=21) | TPC<br>(n=123) | Total<br>(N=188)                                                       | TNC<br>(n=51) | TPC<br>(n=137) | Total<br>(N=69)                                                                                                        | TNC<br>(n=29) | TPC<br>(n=40) |
|                                              | No information                       | 5 (6.0)       | 0             | 5 (7.7)                      | 60 (27.1)     | 15 (20.0)      | 45 (30.8)                                              | 34 (23.6)     | 4 (19.0)       | 30 (24.4)                                                              | 37 (19.7)     | 14 (27.5)      | 23 (16.8)                                                                                                              | 25 (36.2)     | 15 (51.7)     |
| Missing                                      | 0                                    | 0             | 0             | 8 (3.6)                      | 4 (5.3)       | 4 (2.7)        | 0                                                      | 0             | 0              | 1 (0.5)                                                                | 0             | 1 (0.7)        | 0                                                                                                                      | 0             | 0             |
| <b>Genetic variant</b>                       | n=65                                 | n/a           | n=65          | n=146                        | n/a           | n=146          | n=123                                                  | n/a           | n=123          | n=137                                                                  | n/a           | n=137          | n=40                                                                                                                   | n/a           | n=40          |
| Alpha                                        | 0                                    | 0             | 0             | 0                            | 0             | 0              | 0                                                      | 0             | 0              | 0                                                                      | 0             | 0              | 0                                                                                                                      | 0             | 0             |
| Beta                                         | 0                                    | 0             | 0             | 0                            | 0             | 0              | 0                                                      | 0             | 0              | 0                                                                      | 0             | 0              | 0                                                                                                                      | 0             | 0             |
| Delta                                        | 13 (20.0)                            | 0             | 13 (20.0)     | 43 (29.5)                    | 0             | 43 (29.5)      | 53 (43.1)                                              | 0             | 53 (43.1)      | 12 (8.8)                                                               | 0             | 12 (8.8)       | 0                                                                                                                      | 0             | 0             |
| Omicron                                      | 0                                    | 0             | 0             | 0                            | 0             | 0              | 6 (4.9)                                                | 0             | 6 (4.9)        | 67 (48.9)                                                              | 0             | 67 (48.9)      | 13 (32.5)                                                                                                              | 0             | 13 (32.5)     |
| Not interpretable/unknown                    | 0                                    | 0             | 0             | 1 (0.7)                      | 0             | 1 (0.7)        | 0                                                      | 0             | 0              | 1 (0.7)                                                                | 0             | 1 (0.7)        | 0                                                                                                                      | 0             | 0             |
| Missing                                      | 52 (80.0)                            | 0             | 52 (80.0)     | 102 (69.9)                   | 0             | 102 (69.9)     | 64 (52.0)                                              | 0             | 64 (52.0)      | 57 (41.6)                                                              | 0             | 57 (41.6)      | 27 (67.5)                                                                                                              | 0             | 27 (67.5)     |
| <b>Vaccinated against COVID-19</b>           |                                      |               |               |                              |               |                |                                                        |               |                |                                                                        |               |                |                                                                                                                        |               |               |
| No                                           | 79 (94.0)                            | 15 (78.9)     | 64 (98.5)     | 160 (72.4)                   | 38 (50.7)     | 122 (83.6)     | 109 (75.7)                                             | 10 (47.6)     | 99 (80.5)      | 172 (91.5)                                                             | 46 (90.2)     | 126 (92.0)     | 66 (95.7)                                                                                                              | 26 (89.7)     | 40 (100)      |
| Fully vaccinated with two doses of AZD1222   | 5 (6.0)                              | 4 (21.1)      | 1 (1.5)       | 61 (27.6)                    | 37 (49.3)     | 24 (16.4)      | 35 (24.3)                                              | 11 (52.4)     | 24 (19.5)      | 16 (8.5)                                                               | 5 (9.8)       | 11 (8.0)       | 3 (4.3)                                                                                                                | 3 (10.3)      | 0             |
| <b>Month and year of second AZD1222 dose</b> | n=5                                  | n=4           | n=1           | n=61                         | n=37          | n=24           | n=35                                                   | n=11          | n=24           | n=16                                                                   | n=5           | n=11           | n=3                                                                                                                    | n=3           | n=0           |
| March 2021                                   | 0                                    | 0             | 0             | 1 (1.6)                      | 0             | 1 (4.2)        | 0                                                      | 0             | 0              | 0                                                                      | 0             | 0              | 0                                                                                                                      | 0             | 0             |
| April 2021                                   | 0                                    | 0             | 0             | 0                            | 0             | 0              | 0                                                      | 0             | 0              | 0                                                                      | 0             | 0              | 0                                                                                                                      | 0             | 0             |
| May 2021                                     | 0                                    | 0             | 0             | 3 (4.9)                      | 1 (2.7)       | 2 (8.3)        | 0                                                      | 0             | 0              | 2 (12.5)                                                               | 2 (40.0)      | 0              | 0                                                                                                                      | 0             | 0             |
| June 2021                                    | 5 (100)                              | 4 (100)       | 1 (100)       | 18 (29.5)                    | 12 (32.4)     | 6 (25.0)       | 8 (22.9)                                               | 2 (18.2)      | 6 (25.0)       | 1 (6.3)                                                                | 0             | 1 (9.1)        | 1 (33.3)                                                                                                               | 1 (33.3)      | 0             |
| July 2021                                    | 0                                    | 0             | 0             | 38 (62.3)                    | 23 (62.2)     | 15 (62.5)      | 25 (71.4)                                              | 8 (72.7)      | 17 (70.8)      | 12 (75.0)                                                              | 3 (60.0)      | 9 (81.8)       | 0                                                                                                                      | 0             | 0             |
| August 2021                                  | 0                                    | 0             | 0             | 0                            | 0             | 0              | 1 (2.9)                                                | 1 (9.1)       | 0              | 1 (6.3)                                                                | 0             | 1 (9.1)        | 2 (66.7)                                                                                                               | 2 (66.7)      | 0             |
| September 2021                               | 0                                    | 0             | 0             | 1 (1.6)                      | 1 (2.7)       | 0              | 1 (2.9)                                                | 0             | 1 (4.2)        | 0                                                                      | 0             | 0              | 0                                                                                                                      | 0             | 0             |

Data shown are n (%) or median (IQR).

<sup>a</sup>Participants may be included in multiple categories, so percentages do not sum to 100.

<sup>b</sup>As there is no linkage to national testing data, information about prior SARS-CoV-2 infection is reliant on hospital records and patient recall.

COVID-19=coronavirus disease 2019. IQR=interquartile range. SARI=severe acute respiratory infection. SARS-CoV-2=severe acute respiratory syndrome coronavirus 2. TNC=test-negative controls.

TPC=test-positive cases.



**Table S4: Cumulative symptom onset date-adjusted VE estimates by time since last dose and by SARS-CoV-2 genetic variant in SARI patients who had received two doses of AZD1222**

| Time since last dose of AZD1222 | Symptom onset-date-adjusted VE (95% CI) |       |      |                   |                     |                   |
|---------------------------------|-----------------------------------------|-------|------|-------------------|---------------------|-------------------|
|                                 | All                                     | Alpha | Beta | Delta             | Omicron             | Missing           |
| <b>Time period</b>              |                                         |       |      |                   |                     |                   |
| 2 to ≤8 weeks                   | 91.3 (35.5–98.8)                        | NE    | NE   | 85.0 (-96.3–98.8) | NE                  | 96.3 (53.5–99.7)  |
| >8 to ≤16 weeks                 | 79.2 (42.7–92.5)                        | NE    | NE   | 73.5 (-8.7–93.5)  | NE                  | 85.2 (50.9–95.6)  |
| >16 to ≤24 weeks                | 70.5 (39.9–85.5)                        | NE    | NE   | 60.9 (-5.3–85.5)  | 80.4 (-399.3–99.2)  | 69.1 (33.4–85.7)  |
| >24 to ≤32 weeks                | 54.5 (-53.3–86.5)                       | NE    | NE   | 90.0 (-20.2–99.2) | -40.2 (-604.4–72.1) | 86.3 (8.1–98.0)   |
| >32 weeks                       | 80.9 (-7.1–96.6)                        | NE    | NE   | NE                | 69.7 (-195.5–96.9)  | 79.0 (-93.0–97.7) |
| <b>Cumulative time</b>          |                                         |       |      |                   |                     |                   |
| ≤8 weeks                        | 91.3 (35.5–98.8)                        | NE    | NE   | 85.0 (-96.3–98.8) | NE                  | 96.3 (53.5–99.7)  |
| ≤16 weeks                       | 82.7 (57.1–93.0)                        | NE    | NE   | 77.0 (21.7–93.2)  | NE                  | 89.0 (66.7–96.4)  |
| ≤24 weeks                       | 75.5 (56.7–86.1)                        | NE    | NE   | 67.3 (30.1–84.7)  | 80.4 (-399.4–99.2)  | 77.9 (58.2–88.3)  |
| ≤32 weeks                       | 72.3 (53.4–83.6)                        | NE    | NE   | 69.0 (35.0–85.2)  | -17.3 (-437.5–74.4) | 78.7 (60.7–88.4)  |
| <b>All</b>                      | 73.1 (55.8–83.7)                        | NE    | NE   | 69.3 (35.7–85.3)  | 27.2 (-136.5–77.6)  | 78.8 (61.7–88.3)  |

CI=confidence interval. NE=not estimable. VE=vaccine effectiveness.

**Table S5: Confounder-adjusted VE estimates by calendar time-period in SARI patients who had received two doses of AZD1222 and were hospitalised between June 1<sup>st</sup>, 2021, and September 5<sup>th</sup>, 2022.** The calendar time-intervals coincide with changes in the dominance of SARS-CoV-2 genetic variants as reported by the European Centre for Disease Prevention and Control (<https://www.ecdc.europa.eu/en/covid-19/situation-updates/variants-dashboard>) and CoVariants: SARS-CoV-2 Mutations and Variants of Interest ([covariants.org](https://covariants.org)).

| Calendar time-period                                                                                             | Exposure     | Mean time since last          | Test-negative controls | Test-positive cases | Symptom-onset adjusted VE, % (95% CI) | Confounder-adjusted VE, % (95% CI) |
|------------------------------------------------------------------------------------------------------------------|--------------|-------------------------------|------------------------|---------------------|---------------------------------------|------------------------------------|
|                                                                                                                  |              | dose of AZD1222, days (range) |                        |                     |                                       |                                    |
| Jun 1–Jul 31, 2021<br>(Alpha, Delta)                                                                             | Vaccinated   | 29.0 (14–45)                  | 4                      | 1                   | 94.7 (34.4–99.6)                      | 91.0 (-20.5–99.3)                  |
|                                                                                                                  | Unvaccinated | NA                            | 15                     | 64                  |                                       |                                    |
| Aug 1–Nov 30 2021<br>(Delta)                                                                                     | Vaccinated   | 115.7 (42–196)                | 37                     | 24                  | 69.9 (32.7–86.5)                      | 64.6 (6.1–86.6)                    |
|                                                                                                                  | Unvaccinated | NA                            | 38                     | 122                 |                                       |                                    |
| Dec 1–31, 2021<br>(Delta, Omicron clade 21K [BA.1])                                                              | Vaccinated   | 156.0 (107–186)               | 11                     | 24                  | 69.8 (10.3–89.8)                      | 62.6 (-51.7–90.8)                  |
|                                                                                                                  | Unvaccinated | NA                            | 10                     | 99                  |                                       |                                    |
| Jan 1–Mar 31, 2022<br>(Mixed Omicron clades 21K [BA.1] and 21L [BA.2])                                           | Vaccinated   | 210.2 (157–264)               | 5                      | 11                  | 23.2 (-184.3–79.3)                    | 23.1 (-216.5–81.3)                 |
|                                                                                                                  | Unvaccinated | NA                            | 46                     | 126                 |                                       |                                    |
| April 1–Sep 5, 2022<br>(Mixed Omicron clades 21L [BA.2], 22A [BA.4], 22B [BA.5], 22C [BA.2.12.1], 22D [BA.2.75]) | Vaccinated   | 319.7 (296–348)               | 3                      | 0                   | NE                                    | NE                                 |
|                                                                                                                  | Unvaccinated | NA                            | 26                     | 40                  |                                       |                                    |

CI=confidence interval. VE=vaccine effectiveness. NA=not applicable. NE=not estimable. SARI=severe acute respiratory infection.

**Figure S1: Attrition diagram of participants in the COVIDRIVE study and the SARI patients in this study of AZD1222.**

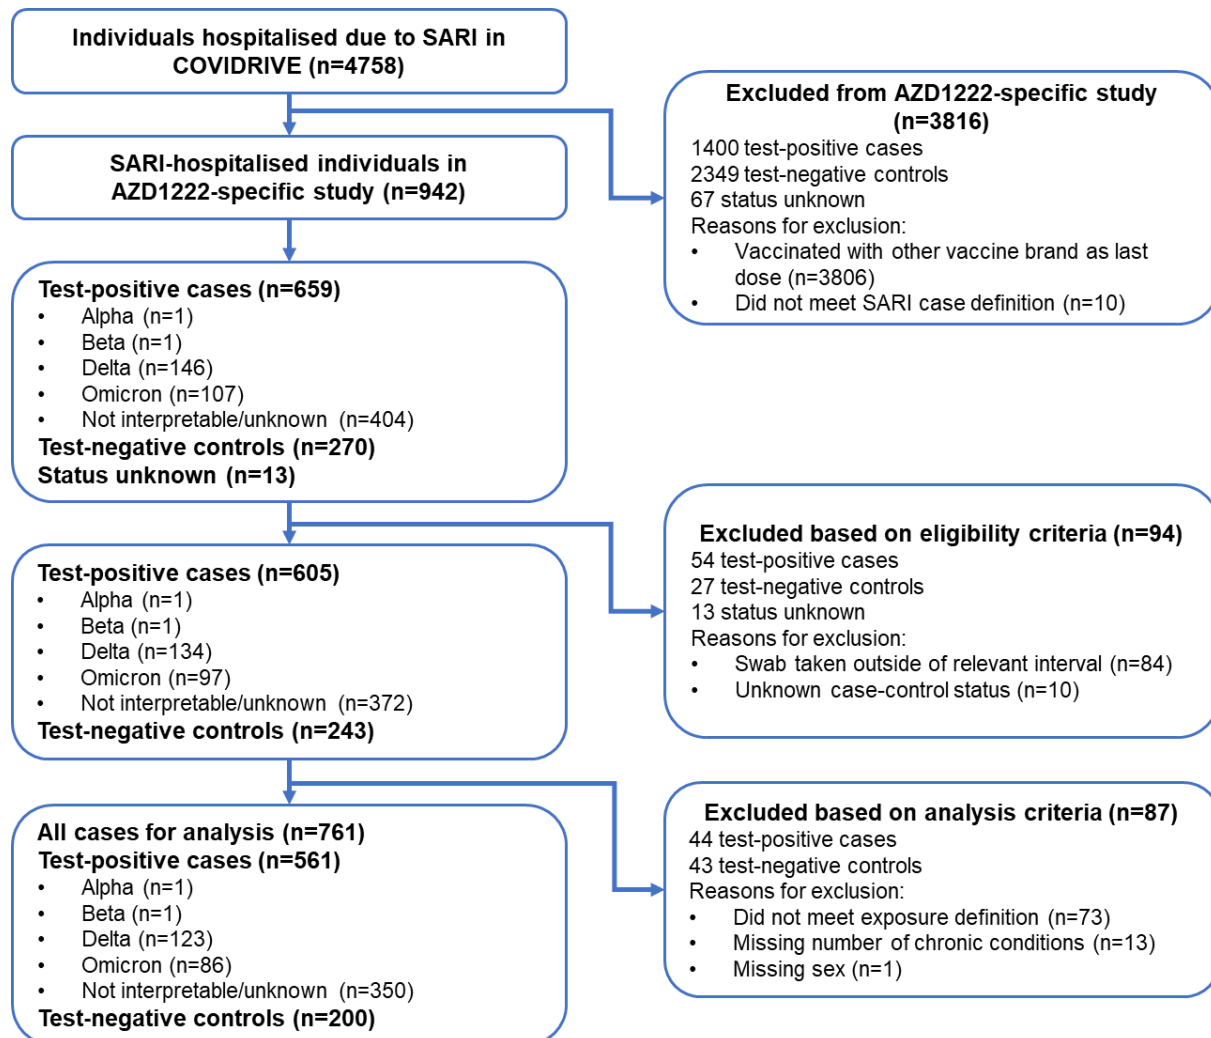

SARI=severe acute respiratory infection.
